# Supplementary material for: An in silico—in vitro Pipeline Identifying an HLA-A*02:01+ KRAS G12V+ Spliced Epitope Candidate for a Broad Tumor-Immune Response in Cancer Patients
Source: PubMed Central journal article supplement (PMC6872521; doi:10.3389/fimmu.2019.02572), 2019-11-15
Supplement: Data_Sheet_1.pdf [file Data_Sheet_1.pdf]

**An *in silico* - *in vitro* pipeline identifying an HLA-A\*02:01+ KRAS G12V+ spliced epitope candidate for a broad tumor - immune response in cancer patients**Mishto *et al.*

|                        |                                                                              |
|------------------------|------------------------------------------------------------------------------|
| Supplementary Table S1 | MS inclusion list                                                            |
| Supplementary Table S2 | Synthetic peptide list                                                       |
| Supplementary Table S3 | Crystal structure data collection and refinement statistics                  |
| Supplementary Figure 1 | MS/MS spectra of the non-spliced epitope candidate KRAS <sub>S-14</sub> G12V |

| Name (KRAS G12V) | sequence   | m/z       | charge |
|------------------|------------|-----------|--------|
| 28_32_11_14      | FVDEYAVGV  | 998.4829  | +1     |
| 28_33_12_14      | FVDEYDVG   | 1042.4728 | +1     |
| 28_34_11_12      | FVDEYDPAV  | 1054.4728 | +1     |
| 28_32_9_12       | FVDEYVGV   | 998.4829  | +1     |
| 28_31_10_14      | FVDEGAVGV  | 892.4411  | +1     |
| 28_31_8_12       | FVDEVVGV   | 934.488   | +1     |
| 24_29_12_14      | IQNHFVGV   | 1012.5574 | +1     |
| 28_32_8_12       | FVDEYVGV   | 1097.5514 | +1     |
| 22_28_11_12      | QLIQNHFAV  | 1069.5789 | +1     |
| 18_24_12_14      | ALTIQLVGV  | 1026.6558 | +1     |
| 28_31_7_12       | FVDEVVGV   | 1033.5564 | +1     |
| 28_30_9_14       | FVDVGAVGV  | 862.4669  | +1     |
| 5_9_11_14        | KLVVAVGV   | 883.5975  | +1     |
| 24_28_11_14      | IQNHFAVGV  | 984.5261  | +1     |
| 5_6_8_14         | KLVVAVGV   | 841.5506  | +1     |
| 5_6_6_12         | KLLVAVGV   | 897.6132  | +1     |
| 7_12_27_29       | VVAVHFV    | 344.6589  | +1     |
| 18_23_12_14      | ALTIQLVGV  | 913.5717  | +1     |
| 28_33_10_12      | FVDEYDGV   | 1014.4415 | +1     |
| 28_33_11_14      | FVDEYDAVGV | 1113.5099 | +1     |
| 28_34_12_14      | FVDEYDPVGV | 1139.5255 | +1     |
| 22_25_10_14      | QLIQAVGV   | 884.52    | +1     |
| 28_32_10_14      | FVDEYAVGV  | 1055.5044 | +1     |
| 18_24_11_12      | ALTIQLIAV  | 941.603   | +1     |
| 28_33_9_12       | FVDEYDGV   | 1113.5099 | +1     |
| 18_19_8_14       | ALVAVGV    | 784.4927  | +1     |
| 28_28_6_14       | FLVVAVGV   | 959.5924  | +1     |
| 22_29_11_12      | QLIQNHFAV  | 1168.6473 | +1     |
| 28_28_7_14       | FVVAVGV    | 846.5084  | +1     |
| 18_25_11_12      | ALTIQLIAV  | 1069.6616 | +1     |
| 28_35_11_12      | FVDEYDPAV  | 1155.5204 | +1     |
| 28_31_9_14       | FVDEVAVGV  | 991.5095  | +1     |
| 22_24_9_14       | QLVAVGV    | 855.5298  | +1     |
| 18_19_6_12       | ALLVAVGV   | 840.5553  | +1     |
| 4_4_6_14         | YLVVAVGV   | 975.5873  | +1     |
| 23_29_11_12      | LIQNHFAV   | 1040.5887 | +1     |
| 5_10_12_14       | KLVVAVGV   | 869.5819  | +1     |
| 28_30_7_12       | FVDVAVGV   | 345.6652  | +1     |
| 21_28_11_12      | IQLIQNHFAV | 1182.663  | +1     |
| 18_23_11_14      | ALTIQLAVGV | 984.6088  | +1     |
| 4_6_8_14         | YKLVAVGV   | 1004.6139 | +1     |
| 7_12_12_14       | VVAVVGV    | 798.5084  | +1     |
| 4_4_7_14         | YVVAVGV    | 862.5033  | +1     |
| 19_24_12_14      | LTIQLVGV   | 955.6186  | +1     |
| 5_7_7_12         | KLVVAVGV   | 883.5975  | +1     |
| 5_7_6_12         | KLVVAVGV   | 996.6816  | +1     |
| 21_25_10_14      | IQLIQAVGV  | 997.6041  | +1     |
| 28_32_11_14      | FVDEYAVGV  | 499.74545 | +2     |
| 28_33_12_14      | FVDEYDVG   | 521.7404  | +2     |
| 28_34_11_12      | FVDEYDPAV  | 527.7404  | +2     |
| 28_32_9_12       | FVDEYVGV   | 499.74545 | +2     |
| 28_31_10_14      | FVDEGAVGV  | 446.72455 | +2     |
| 28_31_8_12       | FVDEVVGV   | 467.748   | +2     |
| 24_29_12_14      | IQNHFVGV   | 506.7827  | +2     |
| 28_32_8_12       | FVDEYVGV   | 549.2797  | +2     |
| 22_28_11_12      | QLIQNHFAV  | 535.29345 | +2     |
| 18_24_12_14      | ALTIQLVGV  | 513.8319  | +2     |
| 28_31_7_12       | FVDEVVGV   | 517.2822  | +2     |
| 28_30_9_14       | FVDVGAVGV  | 431.73745 | +2     |
| 5_9_11_14        | KLVVAVGV   | 442.30275 | +2     |
| 24_28_11_14      | IQNHFAVGV  | 492.76705 | +2     |
| 5_6_8_14         | KLVVAVGV   | 421.2793  | +2     |
| 5_6_6_12         | KLLVAVGV   | 449.3106  | +2     |
| 7_12_27_29       | VVAVHFV    | 172.83345 | +2     |
| 18_23_12_14      | ALTIQLVGV  | 457.28985 | +2     |
| 28_33_10_12      | FVDEYDGV   | 507.72475 | +2     |
| 28_33_11_14      | FVDEYDAVGV | 557.25895 | +2     |
| 28_34_12_14      | FVDEYDPVGV | 570.26675 | +2     |
| 22_25_10_14      | QLIQAVGV   | 442.764   | +2     |
| 28_32_10_14      | FVDEYAVGV  | 528.2562  | +2     |
| 18_24_11_12      | ALTIQLIAV  | 471.3055  | +2     |

|             |             |            |    |
|-------------|-------------|------------|----|
| 28_33_9_12  | FVDEYDVGAV  | 557.25895  | +2 |
| 18_19_8_14  | ALVVGAVGV   | 392.75035  | +2 |
| 28_28_6_14  | FLVVVGAVGV  | 480.3002   | +2 |
| 22_29_11_12 | QLIQNHFAV   | 584.82765  | +2 |
| 28_28_7_14  | FVVVGAVGV   | 423.7582   | +2 |
| 18_25_11_12 | ALTIQLIQAV  | 535.3348   | +2 |
| 28_35_11_12 | FVDEYDPTAV  | 578.2642   | +2 |
| 28_31_9_14  | FVDEVGAVGV  | 496.25875  | +2 |
| 22_24_9_14  | QLIVGAVGV   | 428.2689   | +2 |
| 18_19_6_12  | ALLVVVGAV   | 420.78165  | +2 |
| 4_4_6_14    | YLVVVVGAVGV | 488.29765  | +2 |
| 23_29_11_12 | LIQNHFAV    | 520.79835  | +2 |
| 5_10_12_14  | KLVVVGAVGV  | 435.29495  | +2 |
| 28_30_7_12  | FVDVVVGAV   | 173.3366   | +2 |
| 21_28_11_12 | IQLIQNHFAV  | 591.8355   | +2 |
| 18_23_11_14 | ALTIQLAVGV  | 492.8084   | +2 |
| 4_6_8_14    | YKLVVGAVGV  | 502.81095  | +2 |
| 7_12_12_14  | VVVGAVVGV   | 399.7582   | +2 |
| 4_4_7_14    | YVVVGAVGV   | 431.75565  | +2 |
| 19_24_12_14 | LTIQLIVGV   | 478.3133   | +2 |
| 5_7_7_12    | KLVVVVGAV   | 442.30275  | +2 |
| 5_7_6_12    | KLVLVVVGAV  | 498.8448   | +2 |
| 21_25_10_14 | IQLIQGAVGV  | 499.30605  | +2 |
| 28_32_11_14 | FVDEYAVGV   | 333.499633 | +3 |
| 28_33_12_14 | FVDEYDVG    | 348.162933 | +3 |
| 28_34_11_12 | FVDEYDPAV   | 352.162933 | +3 |
| 28_32_9_12  | FVDEYVAV    | 333.499633 | +3 |
| 28_31_10_14 | FVDEGAVGV   | 298.152367 | +3 |
| 28_31_8_12  | FVDEVVAV    | 312.168    | +3 |
| 24_29_12_14 | IQNHFAVGV   | 338.191133 | +3 |
| 28_32_8_12  | FVDEYVAV    | 366.522467 | +3 |
| 22_28_11_12 | QLIQNHFAV   | 357.1983   | +3 |
| 18_24_12_14 | ALTIQLIVGV  | 342.8906   | +3 |
| 28_31_7_12  | FVDEVVAV    | 345.1908   | +3 |
| 28_30_9_14  | FVDVAVGV    | 288.160967 | +3 |
| 5_9_11_14   | KLVVAVGV    | 295.2045   | +3 |
| 24_28_11_14 | IQNHFAVGV   | 328.847367 | +3 |
| 5_6_8_14    | KLVVAVGV    | 281.188867 | +3 |
| 5_6_6_12    | KLLVVAV     | 299.8764   | +3 |
| 7_12_27_29  | VVAVVHFV    | 115.5583   | +3 |
| 18_23_12_14 | ALTIQLVGV   | 305.1959   | +3 |
| 28_33_10_12 | FVDEYDGA    | 338.819167 | +3 |
| 28_33_11_14 | FVDEYDAVGV  | 371.841967 | +3 |
| 28_34_12_14 | FVDEYDPVGV  | 380.513833 | +3 |
| 22_25_10_14 | QLIQGAVGV   | 295.512    | +3 |
| 28_32_10_14 | FVDEYAVGV   | 352.5068   | +3 |
| 18_24_11_12 | ALTIQLIAV   | 314.539667 | +3 |
| 28_33_9_12  | FVDEYDVGAV  | 371.841967 | +3 |
| 18_19_8_14  | ALVAVGV     | 262.169567 | +3 |
| 28_28_6_14  | FLVVAVGV    | 320.536133 | +3 |
| 22_29_11_12 | QLIQNHFAV   | 390.2211   | +3 |
| 28_28_7_14  | FVVAVGV     | 282.841467 | +3 |
| 18_25_11_12 | ALTIQLIQAV  | 357.225867 | +3 |
| 28_35_11_12 | FVDEYDPTAV  | 385.845467 | +3 |
| 28_31_9_14  | FVDEVGAVGV  | 331.175167 | +3 |
| 22_24_9_14  | QLIVAVGV    | 285.8486   | +3 |
| 18_19_6_12  | ALLVVAV     | 280.8571   | +3 |
| 4_4_6_14    | YLVVVAVGV   | 325.867767 | +3 |
| 23_29_11_12 | LIQNHFAV    | 347.5349   | +3 |
| 5_10_12_14  | KLVVAVGV    | 290.532633 | +3 |
| 28_30_7_12  | FVDVVAV     | 115.893733 | +3 |
| 21_28_11_12 | IQLIQNHFAV  | 394.893    | +3 |
| 18_23_11_14 | ALTIQLAVGV  | 328.874933 | +3 |
| 4_6_8_14    | YKLVAVGV    | 335.5433   | +3 |
| 7_12_12_14  | VVAVVGV     | 266.841467 | +3 |
| 4_4_7_14    | YVVAVGV     | 288.1731   | +3 |
| 19_24_12_14 | LTIQLIVGV   | 319.211533 | +3 |
| 5_7_7_12    | KLVVAV      | 295.2045   | +3 |
| 5_7_6_12    | KLVLVVAV    | 332.8992   | +3 |
| 21_25_10_14 | IQLIQGAVGV  | 333.2067   | +3 |
| 28_32_11_14 | FVDEYAVGV   | 250.376725 | +4 |
| 28_33_12_14 | FVDEYDVG    | 261.3742   | +4 |

|             |             |            |    |
|-------------|-------------|------------|----|
| 28_34_11_12 | FVDEYDPAV   | 264.3742   | +4 |
| 28_32_9_12  | FVDEYVVGAV  | 250.376725 | +4 |
| 28_31_10_14 | FVDEGAVGV   | 223.866275 | +4 |
| 28_31_8_12  | FVDEVVVGAV  | 234.378    | +4 |
| 24_29_12_14 | IQNHFVVG    | 253.89535  | +4 |
| 28_32_8_12  | FVDEYVVGAV  | 275.14385  | +4 |
| 22_28_11_12 | QLIQNHFAV   | 268.150725 | +4 |
| 18_24_12_14 | ALTIQLIVGV  | 257.41995  | +4 |
| 28_31_7_12  | FVDEVVVGAV  | 259.1451   | +4 |
| 28_30_9_14  | FVDVGAVGV   | 216.372725 | +4 |
| 5_9_11_14   | KLVVVAVGV   | 221.655375 | +4 |
| 24_28_11_14 | IQNHFAVGV   | 246.887525 | +4 |
| 5_6_8_14    | KLVVGAVGV   | 211.14365  | +4 |
| 5_6_6_12    | KLLVVVGAV   | 225.1593   | +4 |
| 7_12_27_29  | VVVGAVHFV   | 86.920725  | +4 |
| 18_23_12_14 | ALTIQLVGV   | 229.148925 | +4 |
| 28_33_10_12 | FVDEYDPAV   | 254.366375 | +4 |
| 28_33_11_14 | FVDEYDPAVGV | 279.133475 | +4 |
| 28_34_12_14 | FVDEYDPAVGV | 285.637375 | +4 |
| 22_25_10_14 | QLIQGAVGV   | 221.886    | +4 |
| 28_32_10_14 | FVDEYDPAVGV | 264.6321   | +4 |
| 18_24_11_12 | ALTIQLIAV   | 236.15675  | +4 |
| 28_33_9_12  | FVDEYDPAV   | 279.133475 | +4 |
| 18_19_8_14  | ALVVGAVGV   | 196.879175 | +4 |
| 28_28_6_14  | FLVVVVGAVGV | 240.6541   | +4 |
| 22_29_11_12 | QLIQNHFAV   | 292.917825 | +4 |
| 28_28_7_14  | FVVVGAVGV   | 212.3831   | +4 |
| 18_25_11_12 | ALTIQLIAV   | 268.1714   | +4 |
| 28_35_11_12 | FVDEYDPAV   | 289.6361   | +4 |
| 28_31_9_14  | FVDEYDPAVGV | 248.633375 | +4 |
| 22_24_9_14  | QLIVGAVGV   | 214.63845  | +4 |
| 18_19_6_12  | ALLVVVGAV   | 210.894825 | +4 |
| 4_4_6_14    | YLVVVGAVGV  | 244.652825 | +4 |
| 23_29_11_12 | LIQNHFAV    | 260.903175 | +4 |
| 5_10_12_14  | KLVVVVGAVGV | 218.151475 | +4 |
| 28_30_7_12  | FVDVVVGAV   | 87.1723    | +4 |
| 21_28_11_12 | IQLIQNHFAV  | 296.42175  | +4 |
| 18_23_11_14 | ALTIQLAVGV  | 246.9082   | +4 |
| 4_6_8_14    | YKLVVVGAVGV | 251.909475 | +4 |
| 7_12_12_14  | VVVGAVVGV   | 200.3831   | +4 |
| 4_4_7_14    | YVVVGAVGV   | 216.381825 | +4 |
| 19_24_12_14 | LTIQLIVGV   | 239.66065  | +4 |
| 5_7_7_12    | KLVVVVGAV   | 221.655375 | +4 |
| 5_7_6_12    | KLVLVVVGAV  | 249.9264   | +4 |
| 21_25_10_14 | QLIQGAVGV   | 250.157025 | +4 |

**Supplementary Table S1. MS inclusion list.** List of m/z used for the targeted MS approach.

| Peptide                       | Type                  | Sequence                                        |
|-------------------------------|-----------------------|-------------------------------------------------|
| KRAS <sub>2-35</sub> G12      | substrate             | TEYKLVVVGAGGVGKSALTIQLIQNHVDEYDPT               |
| KRAS <sub>2-35</sub> G12V     | substrate             | TEYKLVVVGAVGVGKSALTIQLIQNHVDEYDPT               |
| KRAS <sub>5-6/8-14</sub> G12V | spliced peptide       | KLVVGAVGV                                       |
| KRAS <sub>5-14</sub> G12V     | non-spliced peptide   | KLVVVGAVGV                                      |
| #1                            |                       | YLVVVGAVGV                                      |
| #2                            |                       | KLVVAVGV                                        |
| #3                            |                       | FLHEDLEKI                                       |
| #4                            |                       | FLHEDTEKI                                       |
| #5                            | TAP competing peptide | TVNKTERCY (fluorescein bound to Cys side chain) |

**Supplementary Table S2. Synthetic peptide list.** List of synthetic peptides used in the study. The name of the peptide depicts the cognate antigen and its position.

| <b>Data collection statistics</b> | HLA-A*02:01 –<br>KRAS <sub>5-6/8-14</sub><br>G12V | HLA-A*02:01 –<br>peptide #2 | HLA-A*02:01 –<br>peptide #1 | HLA-A*02:01 –<br>KRAS <sub>5-14</sub> G12V |
|-----------------------------------|---------------------------------------------------|-----------------------------|-----------------------------|--------------------------------------------|
| PDB ID                            | 6O4Y                                              | 6O4Z                        | 6O51                        | 6O53                                       |
| Space group                       | P2 <sub>1</sub>                                   | P2 <sub>1</sub>             | P2 <sub>1</sub>             | P2 <sub>1</sub>                            |
| Cell dimension                    |                                                   |                             |                             |                                            |
| <i>a. b. c.</i> (Å)               | 52.99. 80.86.<br>56.93                            | 56.13. 79.69. 57.44         | 56.26. 79.46. 57.25         | 56.24. 79.63.<br>57.22                     |
| $\alpha. \beta. \gamma$ (°)       | 90.00. 113.32.<br>90.00                           | 90.00. 116.27. 90.00        | 90.00. 115.96. 90.00        | 90.00. 116.12.<br>90.00                    |
| Resolution range (Å)              | 40.00 – 1.58                                      | 40.00 – 1.50                | 40.00 – 1.55                | 50.00 – 1.40                               |
| [outer shell]                     | (1.62 – 1.58)                                     | (1.53 – 1.50)               | (1.59 – 1.55)               | (1.42 – 1.40)                              |
| No. of unique reflections         | 58659 (4114)                                      | 70589 (4571)                | 63926 (3897)                | 85391 (4213)                               |
| R <sub>meas</sub> (%)             | 6.4 (42.9)                                        | 5.2 (58.9)                  | 5.6 (45.7)                  | 6.8 (53.0)                                 |
| R <sub>pim</sub> (%)              | 3.3 (24.2)                                        | 2.7 (32.2)                  | 3.0 (26.5)                  | 3.9 (32.3)                                 |
| Multiplicity                      | 3.4 (2.8)                                         | 3.6 (3.2)                   | 3.3 (2.6)                   | 2.8 (2.3)                                  |
| Average I/ $\sigma$ I             | 24.04 (1.7)                                       | 24.9 (1.73)                 | 21.8(1.70)                  | 28.7 (1.75)                                |
| Completeness (%)                  | 96.5 (88.4)                                       | 97.8 (95.3)                 | 97.0 (88.9)                 | 96.5 (95.5)                                |
| <b>Refinement statistics</b>      |                                                   |                             |                             |                                            |
| No. atoms                         | 3480                                              | 3448                        | 3623                        | 3472                                       |
| Protein                           | 3095                                              | 3097                        | 3076                        | 3044                                       |
| ligand                            | 59                                                | 70                          | 69                          | 73                                         |
| Water                             | 304                                               | 252                         | 437                         | 331                                        |
| Glycerol/Na/Cl/sulfate            | 22                                                | 29                          | 41                          | 31                                         |
| Ramachandran plot (%)             |                                                   |                             |                             |                                            |
| Favored                           | 97.2                                              | 97.7                        | 97.7                        | 97.8                                       |
| Allowed                           | 2.53                                              | 2.28                        | 1.97                        | 2.17                                       |
| Outliers                          | 0.28                                              | 0                           | 0.28                        | 0                                          |
| R.m.s. deviations                 |                                                   |                             |                             |                                            |
| Bonds (Å)                         | 0.006                                             | 0.005                       | 0.006                       | 0.005                                      |
| Angles (°)                        | 1.299                                             | 1.260                       | 1.283                       | 1.241                                      |
| B-factors (Å <sup>2</sup> )       |                                                   |                             |                             |                                            |
| Protein                           | 19.9                                              | 18.4                        | 18.4                        | 18.4                                       |
| ligand                            | 17.9                                              | 18.3                        | 27.1                        | 25.7                                       |
| Water                             | 30.2                                              | 31.3                        | 33.1                        | 30.9                                       |
| Glycerol/Na/Cl/sulfate            | 31.6                                              | 34.5                        | 43.6                        | 41.6                                       |
| R factor (%)                      | 17.9                                              | 17.4                        | 19.2                        | 18.8                                       |
| R <sub>free</sub> (%)             | 20.4                                              | 19.3                        | 22.4                        | 20.9                                       |

**Supplementary Table S3.** Crystal structure data collection and refinement statistics.

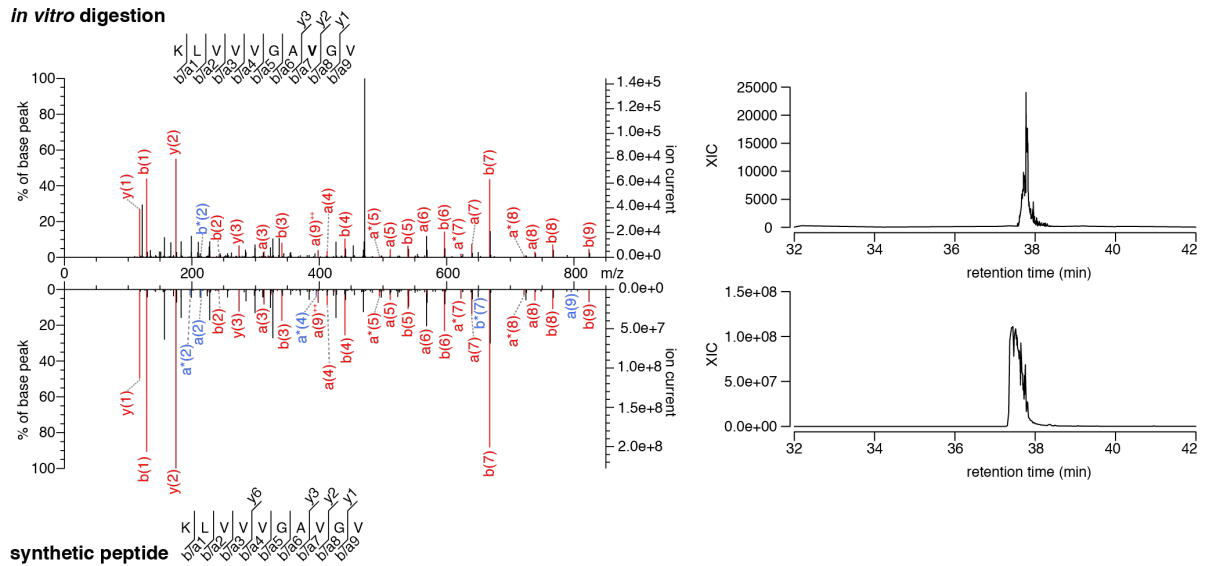

**Supplementary Figure S1. MS/MS spectra of the KRAS<sub>5-14</sub> G12V non-spliced epitope candidate.** MS/MS spectrum of the peptide KRAS<sub>5-14</sub> G12V [KLVVVVGAVGV] identified in the 20 h *in vitro* digestion of the synthetic polypeptide KRAS<sub>2-35</sub> G12V with 20S proteasomes and the MS/MS spectrum of the cognate synthetic peptide (left). The peptide sequence is shown with the corresponding b-, a- and y-ions identified. The G12V mutation is depicted in bold. In the spectra, assigned peaks for b-, a- and y-ions are reported in color. Ion neutral loss of ammonia is symbolized by \*. Red marked peaks are assigned in both the *in vitro* digestion detected MS/MS spectrum and the synthetic peptide MS/MS spectrum, while blue marked peaks are assigned only in one of the two spectra. The extracted ion chromatogram for the peptide identified in the *in vitro* digestion and the synthetic counterpart is plotted and indicates matching retention times for both peptides (right).
